# Supplementary material for: Investigation of the synthesis, SERS performance and application in glucose sensing of hierarchical 3D silver nanostructures
Source: Royal Society of Chemistry journal article supplement (doi:10.1039/c3nj01603j), 2014-05-12
Supplement: c3nj01603j1.pdf [file c3nj01603j1.pdf]

Electronic Supplementary Material (ESI) for New Journal of Chemistry.

This journal is © The Royal Society of Chemistry and the Centre National de la Recherche Scientifique 2014

## Electronic Supplementary Information (ESI)

For

### Investigations on the Synthesis, SERS Performance and Application in Glucose Sensing of Hierarchical 3D Silver Nanostructures

Huan Chen, Jianyong Luo, Tian Zeng, Long Jiang, Yuyang Sun, Zhifeng Jiao, Yong Jin, Xiaosong Sun\*

College of Materials Science & Engineering, Sichuan University, Chengdu 610064, China

\*Corresponding author: [sunxs@scu.edu.cn](mailto:sunxs@scu.edu.cn)

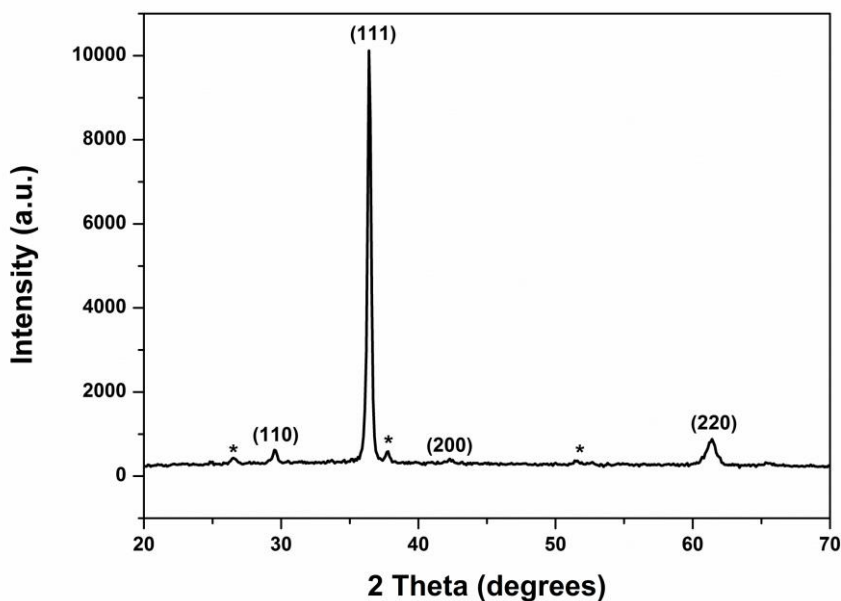

Fig. S1 XRD pattern of the pre-deposited Cu<sub>2</sub>O membrane.

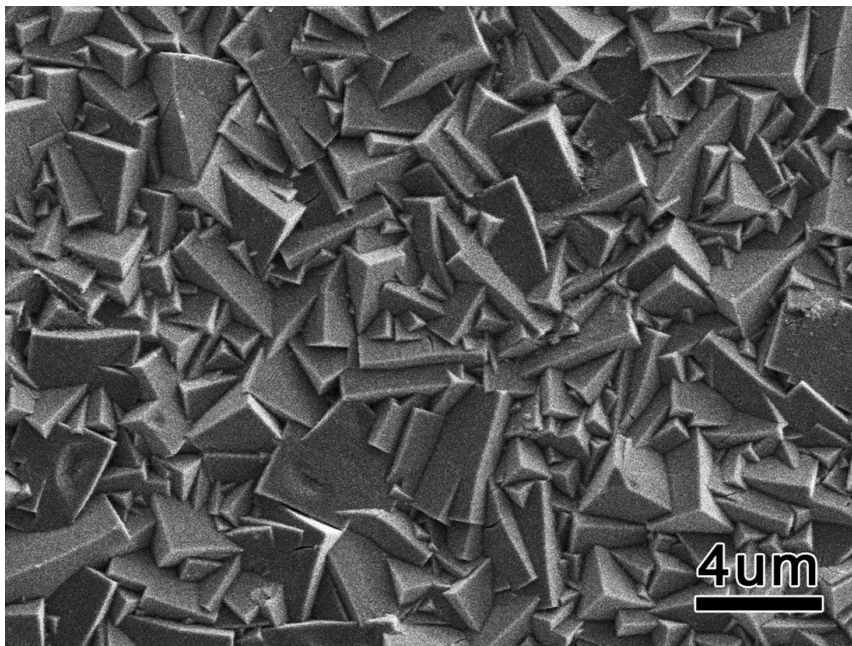

Fig. S2 FESEM image of the pre-deposited Cu<sub>2</sub>O membrane.

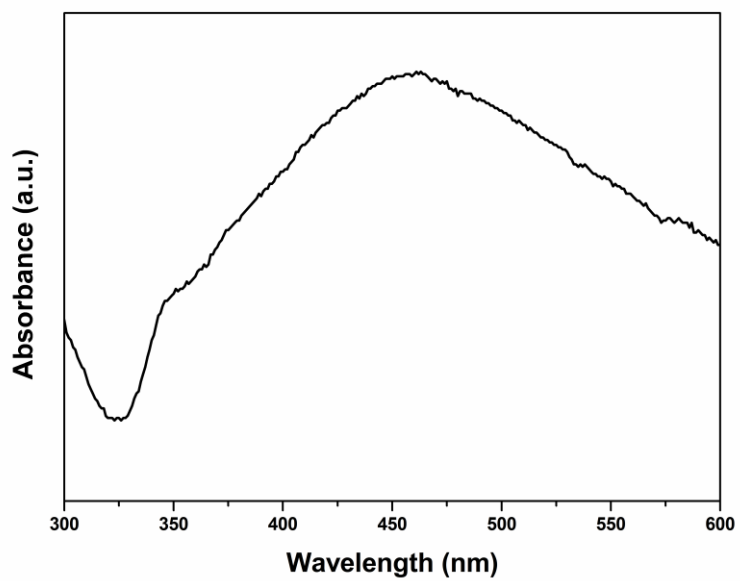

Fig. S3 The UV-vis spectrum of the Ag nanorod film.

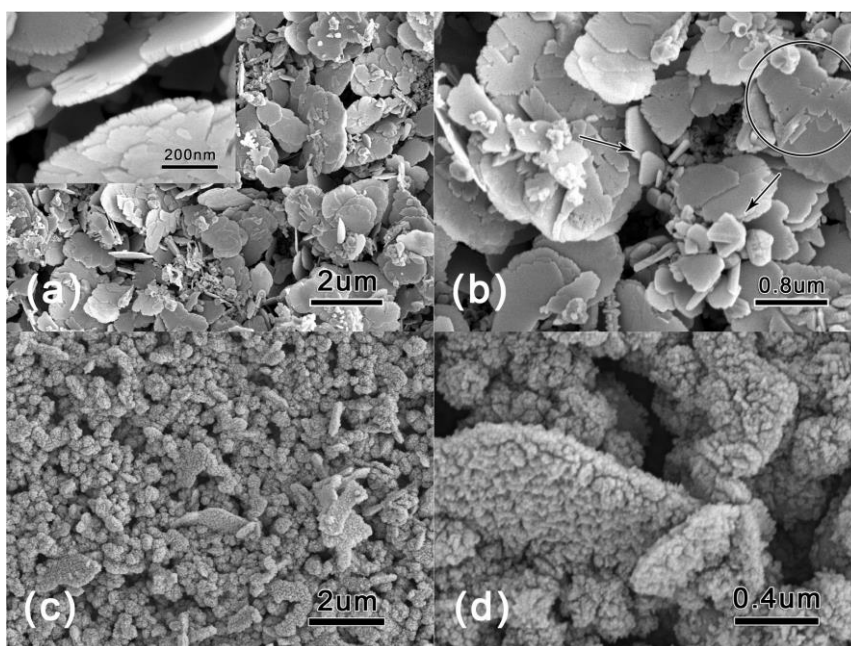

Fig. S4 FESEM images of Ag products synthesized with different concentrations of  $\text{AgNO}_3$ : (a) and (b) 4 mM; (c) and (d) 100 mM. The amount of TSC was kept constant at 3 g/L. The reaction was carried out at room temperature for 30min.

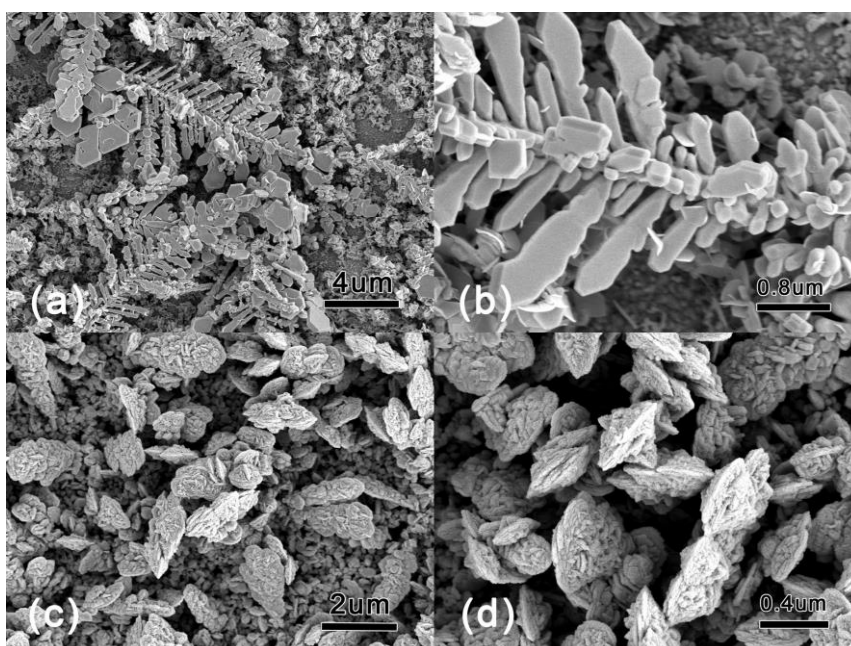

Fig. S5 FESEM images of Ag products with different amount of TSC: (a) and (b) 0 g/L; (c) and (d) 6 g/L. The concentration of  $\text{AgNO}_3$  was kept constant at 20 mM. The reaction was carried out at room temperature for 30min.

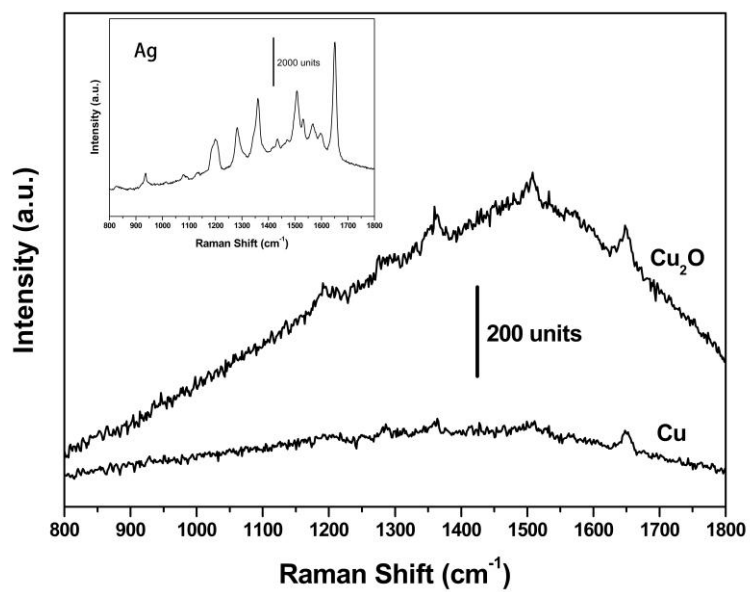

Fig. S6 SERS spectra of  $10^{-8}$  M R6G from three kinds of as-obtained substrates ( $\text{Cu}_2\text{O}$ ,  $\text{Cu}$  and  $\text{Ag}$ ). The exposure time of each measurement was 1s with a laser power (532nm) of 0.27 mW.

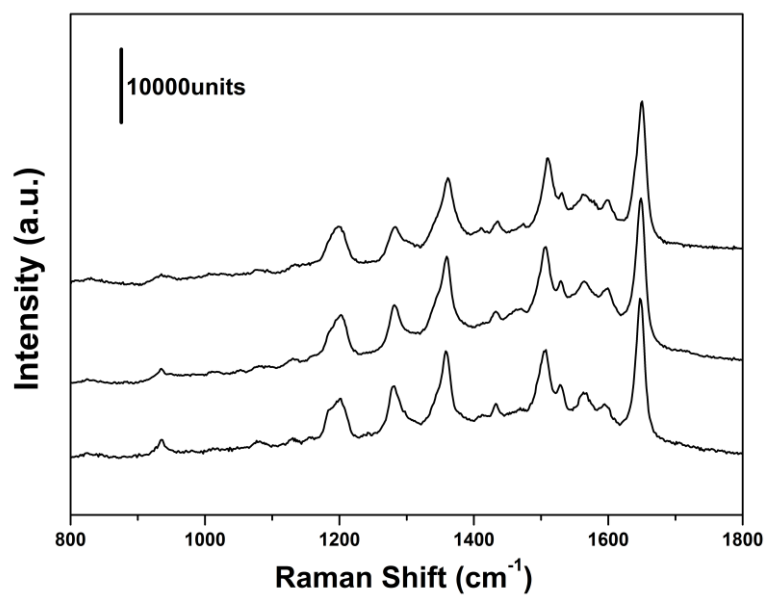

Fig. S7 SERS spectra of  $10^{-6}$  M R6G from three different AgNSs substrates produced by the same method. The exposure time of each measurement was 1s with a laser power (532nm) of 0.27 mW.

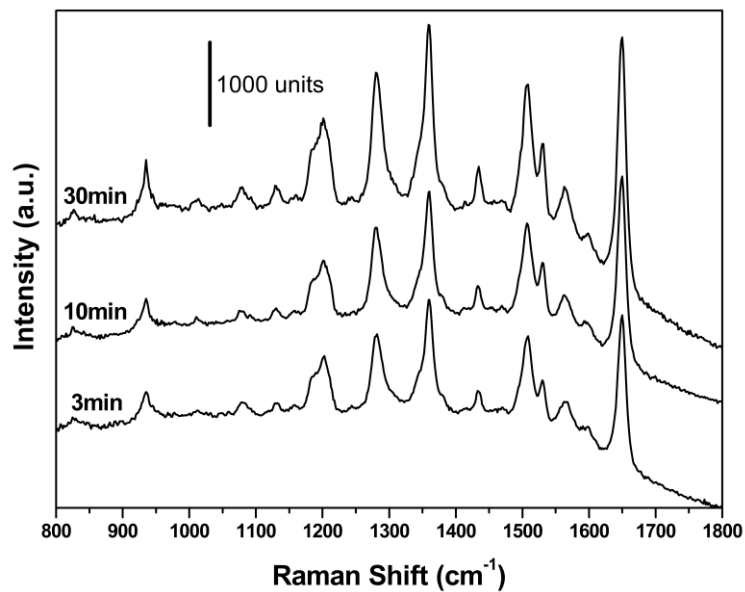

Fig. S8 SERS spectra of  $10^{-8}$  M R6G from time-dependent AgNSs substrates (3 min, 10 min and 30 min). The exposure time of each measurement was 1s with a laser power (532nm) of 0.27 mW.

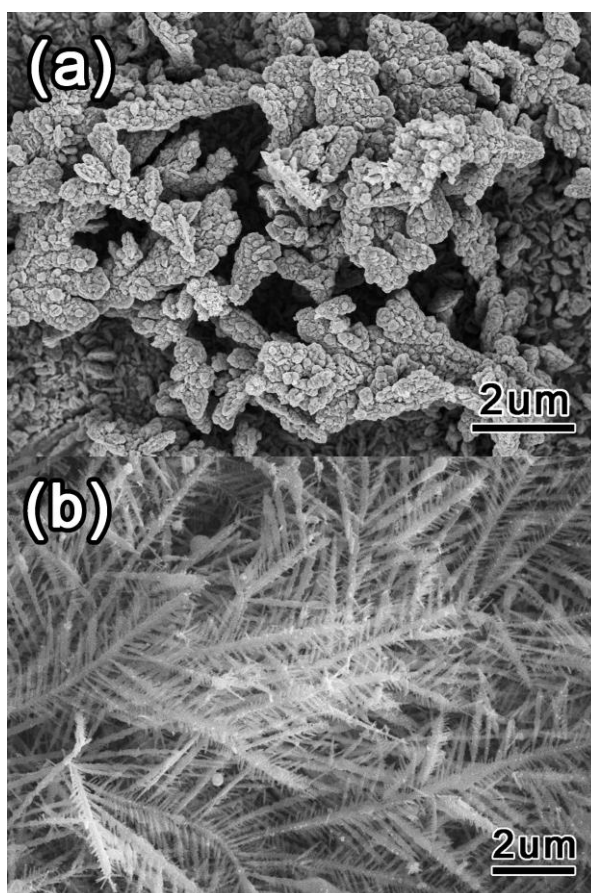

Fig. S9 FESEM images of Ag products with different morphologies: (a) Ag aggregates of AgNPs prepared directly on a Cu foil via galvanic reaction and (b) Ag dendrites deposited on a Si substrate via an electrochemical method.
